# Supplementary material for: Time-varying drainage basin development and erosion on volcanic edifices
Source: Copernicus journal article supplement (doi:10.5194/esurf-12-709-2024), 2024-05-08
Supplement: Supplementary file 1 [file Table_S3.xlsx]

## Sheet: Sheet1
Region	Volcano	Minimum Age (YBP)	Maximuim Age (YBP)	Log Mean Age (YBP)	References	Hacks Law Exponent	Total Drainage Density	Summit Basin Normalized Basin Count	Average Summit Basin Hypsometry Integral	Normalized Average Summit Basin Length	Normalized Average Summit Basin Width (°)	Normalized Average Summit Basin Relief	Average Summit Basin Slope (°)	Edifice Height (km)	Edifice Basal Width (km)	Edifice Height-Radius Ratio	Main Flank Average Slope (°)	Average Irregularity Index	Average Ellipticity Index	Edifice Slope Variance	Normalized Edifice Eroded Volume
Guatemala	Acatenango	50	20000	1000	Global Volcanism Program (2013);Vallance et al. (2001);	0.506339	0.913192	1.31786	0.33944	0.907427	22.8138	0.685442	20.7472	2.92837	12.9769	0.451321	NaN	NaN	NaN	0.605203	17.5398
Guatemala	Atitlan	170	10000	1303.84	Global Volcanism Program (2013);Haapala et al. (2005);Vallance & Calvert (2003);	0.603865	0.915215	1.10396	0.299859	1.00731	25.715	0.71068	18.8255	2.95723	13.3202	0.444021	26.2126	NaN	NaN	0.592224	19.531
Guatemala	San_Pedro	40000	84000	57965.5	Vallance & Calvert (2003);	0.42696	0.412087	2.17606	0.356649	0.850596	37.397	0.947782	23.8842	1.465	7.37462	0.397308	25.9056	1.14514	1.2368	0.554377	17.5052
Guatemala	Toliman	10000	40000	20000	Vallance & Calvert (2003);Haapala et al. (2005);	0.338007	0.566884	0.823274	0.315864	1.08937	35.5583	0.948169	18.1918	1.59949	9.00412	0.355279	31.4991	1.08139	1.62402	0.668335	15.211
Indonesia	Merapi	1	30000	173.205	Gertisser et al. (2012);Global Volcanism Program (2013);	0.559577	0.993585	1.27364	0.290186	1.02495	31.5036	0.822908	16.8051	2.41205	19.5744	0.24645	26.3751	1.47172	1.08006	0.904411	14.8332
Indonesia	Merbabu	224	158000	5949.12	Gomez et al. (2010);Global Volcanism Program (2013);	0.497407	1.01141	0.899881	0.326092	0.936663	42.6079	0.815495	19.0351	2.38175	16.5373	0.288046	25.9341	1.51738	1.347	0.699997	16.0566
Indonesia	Ungaran	300000	500000	387298	Kohno (2006);	0.523799	0.798926	0.75473	0.346774	0.924345	41.4294	0.807136	18.0359	1.71414	14.1583	0.242139	19.6696	1.70589	1.29136	0.698868	21.6442
Indonesia	Muria	2181	800000	41770.8	McBirney et al. (2003);Global Volcanism Program (2013);	0.540054	0.910733	0.332582	0.339631	0.795658	50.5289	0.822072	18.393	1.47296	23.4723	0.125506	16.9993	3.51843	1.17537	0.660234	31.73
Indonesia	Sumbing	292	NaN	NaN	Global Volcanism Program (2013);	0.559212	0.930685	1.52197	0.275313	0.956458	21.0002	0.845946	16.7988	2.66128	17.659	0.301408	19.8602	1.26175	1.03633	0.593796	11.0508
Indonesia	Sundoro	51	34000	1316.81	Prambada et al. (2016);Global Volcanism Program (2013);	0.530924	0.896771	1.60304	0.292501	0.987479	21.2189	0.85832	14.1269	2.30598	15.0198	0.30706	21.9537	1.13881	1.09315	0.690883	9.7739
New Guinea	Bamus	135	NaN	NaN	Global Volcanism Program (2013);	0.577796	0.833022	1.07784	0.314771	0.869957	25.9844	0.77748	17.9446	2.13963	15.1149	0.283115	21.2132	1.38176	1.24746	0.642025	15.7365
New Guinea	Ulawun	1	NaN	NaN	Global Volcanism Program (2013);	0.517852	0.87723	1.74278	0.253127	0.906371	23.9326	0.875258	13.3111	2.29238	17.6793	0.259329	13.071	1.25273	1.21388	0.72919	8.10882
New Guinea	Likuruanga	10000	2580000	160624	Global Volcanism Program (2013);	0.40987	0.364454	0.927943	0.346756	0.736459	60.9262	0.857268	22.8641	0.92411	7.59499	0.243347	23.4193	2.14663	1.43316	0.587977	36.5642
New Zealand	Taranaki	221	120000	5149.76	Neall (1979);Locke et al. (1993);	0.49713	0.909015	1.87095	0.275152	0.873512	22.6354	0.814031	16.7214	2.12912	17.392	0.244839	22.836	1.39513	1.14789	0.908085	11.5074
New Zealand	Pouakai	210000	590000	351994	Neall (1979);Gaylord & Neall (2012);	0.441559	0.793396	0.502749	0.401048	0.812846	54.391	0.727373	18.0769	1.12333	11.567	0.19423	24.7834	2.43382	1.52036	0.675589	28.2284
New Zealand	Kaitake	590000	760000	669627	Neall (1979);Gaylord & Neall (2012);	0.325364	0.350167	1.20655	0.413534	0.684673	49.784	0.652903	17.2102	0.622476	6.19824	0.200856	19.7088	2.14146	1.49278	0.500326	33.67
