# Supplementary material for: Time-varying drainage basin development and erosion on volcanic edifices
Source: Copernicus journal article supplement (doi:10.5194/esurf-12-709-2024), 2024-05-08
Supplement: Supplementary file 2 [file esurf-12-709-2024-supplement.zip]

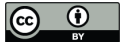

## *Supplement of*

# **Time-varying drainage basin development and erosion on volcanic edifices**

**Daniel O'Hara et al.**

*Correspondence to:* Daniel O'Hara ([daniel.ohara@vub.be](mailto:daniel.ohara@vub.be))

- [esurf-12-709-2024-supplement-title-page.pdf](#)
- Edifice\_Morphology\_ShapeFile
  - Edifice\_Morphologies.dbf
  - Edifice\_Morphologies.prj
  - Edifice\_Morphologies.shp
  - Edifice\_Morphologies.shx
- [OHara\\_et al\\_Supplement.pdf](#)
- [Table\\_S3.xlsx](#)

The copyright of individual parts of the supplement might differ from the article licence.
